# Supplementary material for: The role of extracellular matrix phosphorylation on energy dissipation in bone
Source: eLife. 2020 Dec 9;9:e58184. doi: 10.7554/eLife.58184 (PMC7746230; doi:10.7554/eLife.58184)
Supplement: Figure 4—source data 1. [file elife-58184-fig4-data1.xlsx]

## Sheet: Sheet1
Phosphorylation-Fracture Toughness
WT-phos	WT-ctrl	OPN-phos	OPN-ctrl	delta-opn	delta-WT
4.40363	3.67378	2.67962	3.85903	-1.17941	0.729857
4.11926	2.66488	2.62259	2.86982	-0.247231	1.45438
4.75709	3.90813	3.2615	3.35341	-0.0919024	0.848958
4.27714	4.21067	3.00824	3.9314	-0.92316	0.0664703
4.45237	4.13226	2.87527	2.97041	-0.0951342	0.320115
4.35412	3.50442	2.97329	3.10363	-0.130345	0.849706
3.75334	3.40082	3.03065	3.22284	-0.192191	0.35252
