# Supplementary material for: The role of extracellular matrix phosphorylation on energy dissipation in bone
Source: eLife. 2020 Dec 9;9:e58184. doi: 10.7554/eLife.58184 (PMC7746230; doi:10.7554/eLife.58184)
Supplement: Figure 5—source data 1. [file elife-58184-fig5-data1.xlsx]

## Sheet: Sheet1
Dephosphorylation-Fracture Toughness
WT-dephos	WT-ctrl	OPN-dephos	OPN-ctrl	delta-opn	delta-WT
2.21575	3.56061	2.54133	2.01436	0.526969	-1.34486
3.20497	5.35058	2.55498	2.28842	0.266563	-2.14561
3.95705	4.16581	3.57567	3.31125	0.264421	-0.208763
2.41347	4.31314	2.81999	2.64889	0.1711	-1.89966
4.01844	4.43864	4.16421	4.03973	0.124488	-0.420205
2.42924	3.6892	3.67601	2.49936	1.17665	-1.25997
4.23466	4.44837	3.4811	1.81138	1.66971	-0.213712
