# Supplementary material for: The role of extracellular matrix phosphorylation on energy dissipation in bone
Source: eLife. 2020 Dec 9;9:e58184. doi: 10.7554/eLife.58184 (PMC7746230; doi:10.7554/eLife.58184)
Supplement: Figure 6—source data 1. [file elife-58184-fig6-data1.xlsx]

## Sheet: Sheet1
		RAW DATA
	Phos		Dephos
	2	3	7	8
1	EDTA	Ca	EDTA	Ca
2	-5.18788e-18	2.0626e-16	2.5731e-17	9.69365e-17
3	-3.90717e-18	2.58077e-16	3.78762e-17	1.63025e-16
4	5.15826e-18	2.8426e-16	4.28052e-17	1.98445e-16
5	1.38857e-17	2.85808e-16	4.3371e-17	2.14128e-16
6	1.85306e-17	3.07504e-16	4.60265e-17	2.63534e-16
7	2.01632e-17	3.08256e-16	5.03486e-17	2.64533e-16
8	2.29609e-17	3.14634e-16	6.269e-17	2.66314e-16
9	2.64823e-17	3.33816e-16	6.31481e-17	2.70865e-16
10	2.92379e-17	3.33911e-16	6.44651e-17	2.71609e-16
11	3.12146e-17	3.41554e-16	7.15981e-17	3.01102e-16
12	3.154e-17	3.57567e-16	7.39172e-17	3.0401e-16
13	3.23264e-17	3.6344e-16	7.57482e-17	3.07418e-16
14	3.36914e-17	3.64962e-16	7.64894e-17	3.1138e-16
15	3.55518e-17	3.7671e-16	7.688e-17	3.11514e-16
16	3.61357e-17	4.11015e-16	7.84699e-17	3.34924e-16
17	3.65092e-17	4.15985e-16	8.06065e-17	3.37176e-16
18	4.00875e-17	4.2412e-16	8.36645e-17	3.41595e-16
19	4.06371e-17	4.27358e-16	8.66095e-17	3.50428e-16
20	4.20458e-17	4.27629e-16	8.82813e-17	3.53063e-16
21	4.34418e-17	4.31212e-16	9.03455e-17	3.68928e-16
22	4.50341e-17	4.33797e-16	9.45196e-17	3.7148e-16
23	4.66672e-17	4.39306e-16	1.02434e-16	3.89354e-16
24	5.14856e-17	4.48631e-16	1.02629e-16	3.95885e-16
25	5.2836e-17	4.54717e-16	1.05025e-16	3.97422e-16
26	5.29916e-17	4.6035e-16	1.05036e-16	4.00779e-16
27	5.45478e-17	4.75524e-16	1.0669e-16	4.09612e-16
28	5.55547e-17	4.83227e-16	1.07245e-16	4.22188e-16
29	5.60794e-17	5.01427e-16	1.07415e-16	4.39601e-16
30	5.6587e-17	5.06492e-16	1.08448e-16	4.40992e-16
31	6.00606e-17	5.11107e-16	1.09412e-16	4.43149e-16
32	6.11993e-17	5.11289e-16	1.10748e-16	4.57498e-16
33	6.14179e-17	5.13037e-16	1.12495e-16	4.58849e-16
34	6.22138e-17	5.20278e-16	1.15676e-16	4.73359e-16
35	6.32764e-17	5.21646e-16	1.16259e-16	4.7942e-16
36	6.40562e-17	5.22789e-16	1.16464e-16	4.7973e-16
37	6.45747e-17	5.33282e-16	1.16683e-16	4.84786e-16
38	6.47812e-17	5.35391e-16	1.1748e-16	4.84931e-16
39	6.64151e-17	5.36602e-16	1.20598e-16	4.86489e-16
40	6.68236e-17	5.47293e-16	1.24869e-16	4.93253e-16
41	6.69877e-17	5.5368e-16	1.25237e-16	4.941e-16
42	7.01211e-17	5.55835e-16	1.26325e-16	5.01889e-16
43	7.17883e-17	5.61373e-16	1.26341e-16	5.03509e-16
44	7.36376e-17	5.67624e-16	1.30564e-16	5.05731e-16
45	7.3913e-17	5.73231e-16	1.30784e-16	5.11414e-16
46	7.43384e-17	5.74071e-16	1.31042e-16	5.13583e-16
47	7.44185e-17	5.75783e-16	1.33739e-16	5.27212e-16
48	7.5541e-17	5.7848e-16	1.35843e-16	5.2778e-16
49	7.76834e-17	5.78546e-16	1.39914e-16	5.28628e-16
50	8.13736e-17	5.79321e-16	1.41436e-16	5.29085e-16
51	8.27056e-17	5.83486e-16	1.43407e-16	5.34467e-16
52	8.54064e-17	5.87221e-16	1.43805e-16	5.43368e-16
53	8.5849e-17	5.89379e-16	1.48672e-16	5.43801e-16
54	8.613e-17	5.97595e-16	1.51145e-16	5.45919e-16
55	8.66313e-17	5.98352e-16	1.53184e-16	5.4975e-16
56	9.05076e-17	6.14445e-16	1.56962e-16	5.83467e-16
57	9.18128e-17	6.21946e-16	1.56998e-16	5.85939e-16
58	9.32046e-17	6.26635e-16	1.57618e-16	6.14042e-16
59	9.36941e-17	6.29984e-16	1.57863e-16	6.20739e-16
60	9.39917e-17	6.31052e-16	1.59207e-16	6.23448e-16
61	9.40921e-17	6.32913e-16	1.67105e-16	6.29896e-16
62	9.54317e-17	6.45052e-16	1.72135e-16	6.32564e-16
63	9.57892e-17	6.64794e-16	1.93776e-16	6.39928e-16
64	9.96034e-17	6.66878e-16	1.99026e-16	6.49717e-16
65	1.01529e-16	6.68326e-16	2.04348e-16	6.98713e-16
66	1.02193e-16	6.77413e-16	2.10779e-16	7.14781e-16
67	1.03199e-16	6.81605e-16	2.27352e-16	7.59991e-16
68	1.05107e-16	6.83685e-16	2.2884e-16	7.93165e-16
69	1.06904e-16	6.90099e-16	2.33463e-16	8.09671e-16
70	1.07246e-16	6.90279e-16	2.37635e-16	8.29882e-16
71	1.07382e-16	6.90893e-16	2.56703e-16	8.77141e-16
72	1.07473e-16	7.04215e-16	2.60268e-16	8.92371e-16
73	1.08586e-16	7.05598e-16	2.63045e-16	9.70839e-16
74	1.10494e-16	7.13975e-16	2.99783e-16	9.98612e-16
75	1.13537e-16	7.17157e-16	3.6769e-16	1.02074e-15
76	1.16984e-16	7.18872e-16	3.95108e-16	1.02444e-15
77	1.19749e-16	7.19635e-16	4.03659e-16	1.02738e-15
78	1.2227e-16	7.38318e-16	4.38976e-16	1.03544e-15
79	1.27414e-16	7.46817e-16	4.59089e-16	1.06666e-15
80	1.32738e-16	7.53305e-16	5.04276e-16	1.06929e-15
81	1.33159e-16	7.58145e-16	5.11617e-16
82	1.35451e-16	7.60543e-16	5.65709e-16
83	1.36787e-16	7.7381e-16	6.06986e-16
84	1.38549e-16	7.85509e-16	6.98151e-16
85	1.38569e-16	7.85989e-16	9.53555e-16
86	1.39577e-16	8.01332e-16	9.82186e-16
87	1.40476e-16	8.02123e-16	1.12208e-15
88	1.43039e-16	8.19848e-16	1.24931e-15
89	1.43702e-16	8.2152e-16	2.84824e-15
90	1.50717e-16	8.33628e-16
91	1.53639e-16	8.43612e-16
92	1.6211e-16	8.62975e-16
93	1.69043e-16	8.90182e-16
94	1.70869e-16	8.90913e-16
95	1.72401e-16	8.92596e-16
96	1.75435e-16	9.70011e-16
97	2.2499e-16	1.02263e-15
98	2.32047e-16	1.02766e-15
99	2.56429e-16	1.14769e-15
100	2.59948e-16	1.25162e-15
101	2.71946e-16	1.84204e-15
102	8.32451e-16
103	8.98706e-16
104	1.09642e-15
	1.14304e-15
