# Supplementary material for: The role of extracellular matrix phosphorylation on energy dissipation in bone
Source: eLife. 2020 Dec 9;9:e58184. doi: 10.7554/eLife.58184 (PMC7746230; doi:10.7554/eLife.58184)
Supplement: Figure 6—source data 2. [file elife-58184-fig6-data2.xlsx]

## Sheet: pH8.5
H2O_dw10	Na_dw10	Ca_dw10
Energy	Energy	Energy
4.27808e-17	1.88826e-16	1.81629e-16
7.08432e-17	1.51819e-16	1.97127e-16
4.13952e-17	9.84334e-17	2.12965e-16
8.70065e-17	8.93286e-17	1.24724e-16
4.20754e-17	1.35364e-16	2.02565e-16
9.89892e-17	6.44541e-17	2.0033e-16
6.60231e-17	1.27018e-16	2.04229e-16
4.92623e-17	1.96437e-16	1.61924e-15
8.91108e-17	1.81128e-16	5.71445e-16
7.43533e-17	1.8105e-16	4.40397e-16
9.04318e-17	5.24173e-17	1.27241e-16
2.02964e-16	6.55234e-17	2.09475e-16
1.64917e-16	1.05703e-16	1.16532e-16
1.19129e-16	1.23334e-16	2.16296e-16
1.73403e-16	1.57564e-16	1.01918e-16
1.88604e-16	2.06606e-16	1.20397e-16
1.92382e-16	2.05725e-16	1.26353e-16
1.93863e-16	1.75103e-16	1.66927e-16
2.47195e-16	1.4114e-16	1.25722e-16
3.42755e-16	2.09504e-16	1.42621e-16
2.72714e-16	9.43652e-17	1.7878e-16
3.24622e-16	1.29492e-16	3.11101e-16
2.84597e-16	1.38591e-16	2.71102e-16
2.11413e-16	1.03552e-16	1.56377e-16
1.69856e-16	1.3561e-16	3.64998e-16
2.79136e-16	1.99447e-16	2.50997e-16
2.04337e-16	1.52251e-16	1.10131e-16
1.34723e-16	1.73382e-16	1.24698e-16
1.04504e-16	2.40086e-16	7.31266e-17
1.65237e-16	1.69081e-16	2.69531e-16
1.29822e-16	2.47031e-16	1.86705e-16
2.62144e-16	9.32072e-17	2.13065e-16
1.78376e-16	6.13208e-17	2.37828e-17
2.07801e-16	1.03468e-16	2.79969e-16
1.54406e-16	1.8438e-16	1.71903e-16
2.13697e-16	1.46372e-16	5.17571e-16
2.0059e-16	1.65196e-16	4.11452e-16
1.14053e-16	1.16938e-16	2.43143e-16
1.60233e-16	1.73468e-16	2.49884e-16
1.29734e-16	2.14455e-16	3.55261e-16
9.15152e-17	1.51222e-16	2.9713e-16
7.44482e-17	1.81063e-16	3.70237e-16
1.19457e-16	1.11701e-16	9.33946e-17
9.49473e-17	1.48998e-16	4.50972e-16
1.17782e-16	3.11892e-16	2.86112e-16
1.66809e-16	2.1068e-16	2.62645e-16
5.98593e-17	1.27118e-16	1.41067e-16
1.03703e-16	1.76927e-16	1.75653e-16
1.00756e-16	1.55168e-16	1.86844e-16
4.76491e-17	1.04726e-16	2.21819e-16
1.01893e-16	1.94159e-16	2.56742e-16
6.86237e-17	1.96454e-16	1.86909e-16
6.2917e-17	1.05457e-16	2.47547e-16
1.02754e-16		3.33787e-16
9.71774e-17		2.21481e-16
		3.00491e-16

## Sheet: pH6.0
H2O_dw10	Na_dw10	Ca_dw10
Energy	Energy	Energy
8.71977e-16	6.18968e-16	3.64529e-16
4.89752e-16	7.40214e-16	2.80469e-16
1.06599e-15	5.85645e-16	3.33287e-16
9.46412e-16	6.51922e-16	5.36679e-16
5.96368e-16	6.45035e-16	5.2139e-16
6.44977e-16	6.64491e-16	4.77465e-16
5.74992e-16	5.21871e-16	6.13803e-16
5.13569e-16	5.73284e-16	3.61707e-16
6.44024e-16	6.2765e-16	4.63476e-16
5.46037e-16	5.58669e-16	4.88995e-16
4.72282e-16	4.69586e-16	3.45907e-16
5.53288e-16	8.47402e-16	4.70791e-16
5.60821e-16	5.46601e-16	4.9262e-16
7.22857e-16	7.40747e-16	4.68468e-16
6.47503e-16	5.97295e-16	3.77295e-16
7.57619e-16	5.43665e-16	4.50581e-16
4.28401e-16	6.99432e-16	3.58316e-16
8.20032e-16	6.23669e-16	4.54117e-16
6.80859e-16	6.44377e-16	5.37902e-16
6.89615e-16	6.44905e-16	4.01138e-16
6.88772e-16	6.2105e-16	3.5537e-16
5.51682e-16	4.67398e-16	4.47731e-16
6.96131e-16	7.28427e-16	3.69781e-16
4.81045e-16	6.67165e-16	3.06003e-16
5.5613e-16	6.4219e-16	5.60212e-16
4.19316e-16	3.20345e-16	1.72763e-16
4.02262e-16	7.28298e-16	3.77051e-16
6.02878e-16	6.8315e-16	3.4494e-16
4.57291e-16	5.96449e-16	3.84178e-16
7.56606e-16	5.27005e-16	2.73571e-16
4.57929e-16	5.50192e-16	3.81667e-16
6.30224e-16	5.82611e-16	2.05998e-16
5.79411e-16	7.24891e-16	4.51824e-16
3.16538e-16	7.13469e-16	5.07673e-16
7.11074e-16	5.22408e-16	4.28638e-16
3.69899e-16	2.328e-16	4.15543e-16
4.03071e-16	5.4578e-16	4.51422e-16
6.13031e-16	1.0007e-15	5.88807e-16
6.27465e-16	6.90155e-16	2.38502e-16
3.17365e-16	7.90879e-16	2.80727e-16
5.67933e-16	6.92618e-16	3.79431e-16
4.1885e-16	6.81137e-16	4.0655e-16
2.7665e-16	6.72504e-16	3.11335e-16
1.96456e-16	6.80848e-16	4.48666e-16
	7.4879e-16	3.87541e-16
	6.66611e-16	3.06381e-16
	7.49521e-16	3.16285e-16
	7.6845e-16	4.15234e-16
	7.944e-16	5.0075e-16
	8.23288e-16	4.01751e-16
	7.90058e-16	3.6779e-16
	--	4.52102e-16
	--	2.78667e-16
